# Supplementary material for: Origin of M2 Mϕ and its macrophage polarization by TGF-β in a mice intervertebral injury model
Source: PubMed Central journal article supplement — Int J Immunopathol Pharmacol. 2022 May 19;36:03946320221103792. doi: 10.1177/03946320221103792 (PMC9174651; doi:10.1177/03946320221103792), 2022-05-19
Supplement: sj-pdf-1-iji-10.1177_03946320221103792.pdf [file sj-pdf-1-iji-10.1177_03946320221103792.pdf]

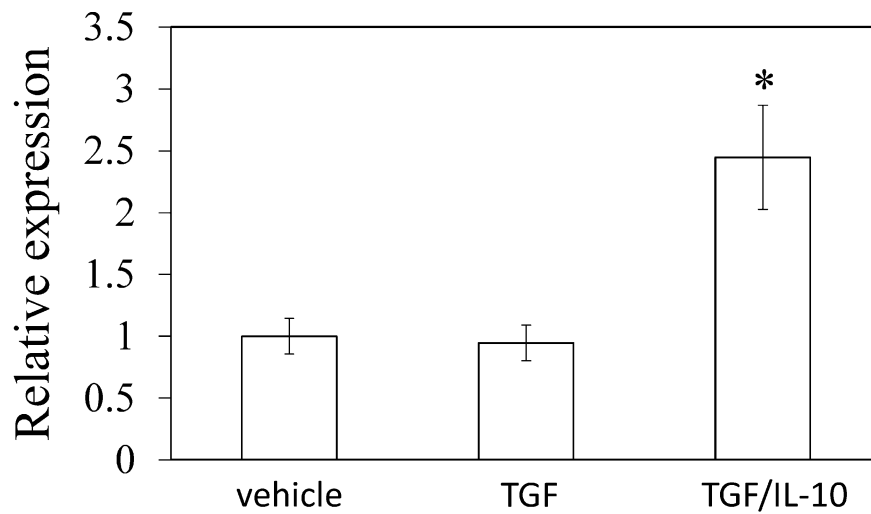

**Supplementary Figure 1. Effect of TGF- $\beta$  on CD206 expression of disc macrophages in the presence of IL-10**

Disc macrophages (DMs) were exposed to  $\alpha$ -MEM (vehicle), 10 ng/mL mouse recombinant (mh) TGF- $\beta$  + 10 ng/ml IL-10 (TGF), or recombinant (mh) TGF- $\beta$  + 10 ng/ml IL-10 (TGF/IL10) for 24 h. RT-PCR analysis showed that TGF increased Cd206 expression in the presence of IL-10; however, TGF- $\beta$  showed no effect on CD206 in the absence of IL-10 in vitro.
